# Supplementary material
Source: HighWire-hosted journal article supplement (https://erj.ersjournals.com/content/57/6/2003344)
Supplement: inline-supplementary-material-1 [file inline-supplementary-material-1.pdf]

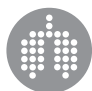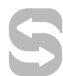

SHAREABLE PDF

# Prevalence, progression and impact of chronic cough on employment in Northern Europe

Henrik Johansson <sup>1,2,3</sup>, Ane Johannessen<sup>4</sup>, Mathias Holm<sup>5</sup>, Bertil Forsberg <sup>6</sup>, Vivi Schlünssen<sup>7</sup>, Rain Jögi <sup>8</sup>, Michael Clausen<sup>9</sup>, Eva Lindberg<sup>3</sup>, Andrei Malinowski <sup>2</sup> and Össur Ingi Emilsson<sup>3,9</sup>

**Affiliations:** <sup>1</sup>Dept of Neuroscience, Uppsala University, Uppsala, Sweden. <sup>2</sup>Clinical Physiology, Dept of Medical Sciences, Uppsala University, Uppsala, Sweden. <sup>3</sup>Respiratory, Allergy and Sleep Research, Dept of Medical Sciences, Uppsala University, Uppsala, Sweden. <sup>4</sup>Centre for International Health, Dept of Global Public Health and Primary Care, University of Bergen, Bergen, Norway. <sup>5</sup>Occupational and Environmental Medicine, School of Public Health and Community Medicine, Institute of Medicine, Sahlgrenska Academy, University of Gothenburg, Gothenburg, Sweden. <sup>6</sup>Sustainable Health, Dept of Public Health and Clinical Medicine, Umeå University, Umeå, Sweden. <sup>7</sup>Dept of Public Health, Section for Environment, Occupation and Health, Danish Ramazzini Center, Aarhus University, Aarhus, Denmark. <sup>8</sup>Lung Clinic, Tartu University Hospital, Tartu, Estonia. <sup>9</sup>Faculty of Medicine, University of Iceland, Reykjavik, Iceland.

**Correspondence:** Össur Ingi Emilsson, Respiratory, Allergy and Sleep Research, Dept of Medical Sciences, Uppsala Universitet, Akademiska sjukhuset, Ingång 40, 5 tr, 751 85 Uppsala, Sweden.  
E-mail: ossur.emilsson@medsci.uu.se

@ERSpublications

**In an adult general population, one in six reports chronic cough. Chronic cough, current and a decade earlier, is associated with increased sick leave days and decreased work ability in middle-aged adults from the general Northern European population.** <https://bit.ly/35Iz694>

**Cite this article as:** Johansson H, Johannessen A, Holm M, *et al.* Prevalence, progression and impact of chronic cough on employment in Northern Europe. *Eur Respir J* 2021; 57: 2003344 [<https://doi.org/10.1183/13993003.03344-2020>].

This single-page version can be shared freely online.

**ABSTRACT** We investigated the prevalence of chronic cough and its association with work ability and sick leave in the general population.

Data were analysed from the Respiratory Health In Northern Europe (RHINE) III cohort (n=13 500), of which 11 252 participants had also participated in RHINE II 10 years earlier, a multicentre study in Northern Europe. Participants answered a questionnaire on chronic cough, employment factors, smoking and respiratory comorbidities.

Nonproductive chronic cough was found in 7% and productive chronic cough in 9% of the participants. Participants with nonproductive cough were more often female and participants with productive cough were more often smokers and had a higher body mass index (BMI) than those without cough. Participants with chronic cough more often reported >7 days of sick leave in the preceding year than those without cough (“nonproductive cough” 21% and “productive cough” 24%; p<0.001 for comparisons with “no cough” 13%). This pattern was consistent after adjusting for age, sex, BMI, education level, smoking status and comorbidities. Participants with chronic cough at baseline reported lower work ability and more often had >7 days of sick leave at follow-up than those without cough. These associations remained significant after adjusting for cough at follow-up and other confounding factors.

Chronic cough was found in around one in six participants and was associated with more sick leave. Chronic cough 10 years earlier was associated with lower work ability and sick leave at follow-up. These associations were not explained by studied comorbidities. This indication of negative effects on employment from chronic cough needs to be recognised.
